# Supplementary material
Source: publisher site journal article supplement (https://en-cdn.bio-protocol.org/attached/file/20200409/3614%20Supplemental.docx)
Supplement: Supplementary file 1 [file 3614%20Supplemental.docx]

**Table 1. Primer List**

| **Primer Name** | **Barcode Sequence** | **Primer Sequence** |
| --- | --- | --- |
| R1_forward |  | GAGGGCCTATTTCCCATGATTCCTTCA |
| R1_reverse |  | aacttctcggggactgtgg |
| R2_reverse |  | CAAGCAGAAGACGGCATACGAGATGTGACTGGAGTTCAGACGTGTGCTCTTCCGATCTtgccactttttcaagttgataacggact |
| R2_index1 | ATCACG | AATGATACGGCGACCACCGAGATCTACACTCTTTCCCTACACGACGCTCTTCCGATCTATCACGtcttgtggaaaggacgaaacaccg |
| R2_index2 | CGATGT | AATGATACGGCGACCACCGAGATCTACACTCTTTCCCTACACGACGCTCTTCCGATCTCGATGTtcttgtggaaaggacgaaacaccg |
| R2_index3 | TTAGGC | AATGATACGGCGACCACCGAGATCTACACTCTTTCCCTACACGACGCTCTTCCGATCTTTAGGCtcttgtggaaaggacgaaacaccg |
| R2_index4 | TGACCA | AATGATACGGCGACCACCGAGATCTACACTCTTTCCCTACACGACGCTCTTCCGATCTTGACCAtcttgtggaaaggacgaaacaccg |
| R2_index5 | ACAGTG | AATGATACGGCGACCACCGAGATCTACACTCTTTCCCTACACGACGCTCTTCCGATCTACAGTGtcttgtggaaaggacgaaacaccg |
| R2_index6 | GCCAAT | AATGATACGGCGACCACCGAGATCTACACTCTTTCCCTACACGACGCTCTTCCGATCTGCCAATtcttgtggaaaggacgaaacaccg |
| R2_index7 | CAGATC | AATGATACGGCGACCACCGAGATCTACACTCTTTCCCTACACGACGCTCTTCCGATCTCAGATCtcttgtggaaaggacgaaacaccg |
| R2_index8 | ACTTGA | AATGATACGGCGACCACCGAGATCTACACTCTTTCCCTACACGACGCTCTTCCGATCTACTTGAtcttgtggaaaggacgaaacaccg |
| R2_index9 | GATCAG | AATGATACGGCGACCACCGAGATCTACACTCTTTCCCTACACGACGCTCTTCCGATCTGATCAGtcttgtggaaaggacgaaacaccg |
| R2_index10 | TAGCTT | AATGATACGGCGACCACCGAGATCTACACTCTTTCCCTACACGACGCTCTTCCGATCTTAGCTTtcttgtggaaaggacgaaacaccg |
| R2_index11 | CTTGTA | AATGATACGGCGACCACCGAGATCTACACTCTTTCCCTACACGACGCTCTTCCGATCTCTTGTAtcttgtggaaaggacgaaacaccg |
| R2_index12 | AGTCAA | AATGATACGGCGACCACCGAGATCTACACTCTTTCCCTACACGACGCTCTTCCGATCTAGTCAAtcttgtggaaaggacgaaacaccg |
| R2_index13 | AGTTCC | AATGATACGGCGACCACCGAGATCTACACTCTTTCCCTACACGACGCTCTTCCGATCTAGTTCCtcttgtggaaaggacgaaacaccg |
| R2_index14 | ATGTCA | AATGATACGGCGACCACCGAGATCTACACTCTTTCCCTACACGACGCTCTTCCGATCTATGTCAtcttgtggaaaggacgaaacaccg |
| R2_index15 | CCGTCC | AATGATACGGCGACCACCGAGATCTACACTCTTTCCCTACACGACGCTCTTCCGATCTCCGTCCtcttgtggaaaggacgaaacaccg |
| R2_index16 | GTAGAG | AATGATACGGCGACCACCGAGATCTACACTCTTTCCCTACACGACGCTCTTCCGATCTGTAGAGtcttgtggaaaggacgaaacaccg |
| R2_index17 | GTGAAA | AATGATACGGCGACCACCGAGATCTACACTCTTTCCCTACACGACGCTCTTCCGATCTGTGAAAtcttgtggaaaggacgaaacaccg |
| R2_index18 | GTGGCC | AATGATACGGCGACCACCGAGATCTACACTCTTTCCCTACACGACGCTCTTCCGATCTGTGGCCtcttgtggaaaggacgaaacaccg |
| R2_index19 | GTTTCG | AATGATACGGCGACCACCGAGATCTACACTCTTTCCCTACACGACGCTCTTCCGATCTGTTTCGtcttgtggaaaggacgaaacaccg |
| R2_index20 | CGTACG | AATGATACGGCGACCACCGAGATCTACACTCTTTCCCTACACGACGCTCTTCCGATCTCGTACGtcttgtggaaaggacgaaacaccg |
| R2_index21 | GAGTGG | AATGATACGGCGACCACCGAGATCTACACTCTTTCCCTACACGACGCTCTTCCGATCTGAGTGGtcttgtggaaaggacgaaacaccg |
| R2_index22 | GGTAGC | AATGATACGGCGACCACCGAGATCTACACTCTTTCCCTACACGACGCTCTTCCGATCTGGTAGCtcttgtggaaaggacgaaacaccg |
| R2_index23 | ACTGAT | AATGATACGGCGACCACCGAGATCTACACTCTTTCCCTACACGACGCTCTTCCGATCTACTGATtcttgtggaaaggacgaaacaccg |
| R2_index24 | ATGAGC | AATGATACGGCGACCACCGAGATCTACACTCTTTCCCTACACGACGCTCTTCCGATCTATGAGCtcttgtggaaaggacgaaacaccg |
| R2_index25 | ATTCCT | AATGATACGGCGACCACCGAGATCTACACTCTTTCCCTACACGACGCTCTTCCGATCTATTCCTtcttgtggaaaggacgaaacaccg |
| R2_index26 | CAAAAG | AATGATACGGCGACCACCGAGATCTACACTCTTTCCCTACACGACGCTCTTCCGATCTCAAAAGtcttgtggaaaggacgaaacaccg |
| R2_index27 | CAACTA | AATGATACGGCGACCACCGAGATCTACACTCTTTCCCTACACGACGCTCTTCCGATCTCAACTAtcttgtggaaaggacgaaacaccg |
| R2_index28 | CACCGG | AATGATACGGCGACCACCGAGATCTACACTCTTTCCCTACACGACGCTCTTCCGATCTCACCGGtcttgtggaaaggacgaaacaccg |
| R2_index29 | CACGAT | AATGATACGGCGACCACCGAGATCTACACTCTTTCCCTACACGACGCTCTTCCGATCTCACGATtcttgtggaaaggacgaaacaccg |
| R2_index30 | CACTCA | AATGATACGGCGACCACCGAGATCTACACTCTTTCCCTACACGACGCTCTTCCGATCTCACTCAtcttgtggaaaggacgaaacaccg |
| R2_index31 | CAGGCG | AATGATACGGCGACCACCGAGATCTACACTCTTTCCCTACACGACGCTCTTCCGATCTCAGGCGtcttgtggaaaggacgaaacaccg |
| R2_index32 | CATGGC | AATGATACGGCGACCACCGAGATCTACACTCTTTCCCTACACGACGCTCTTCCGATCTCATGGCtcttgtggaaaggacgaaacaccg |
| R2_index33 | CATTTT | AATGATACGGCGACCACCGAGATCTACACTCTTTCCCTACACGACGCTCTTCCGATCTCATTTTtcttgtggaaaggacgaaacaccg |
| R2_index34 | CCAACA | AATGATACGGCGACCACCGAGATCTACACTCTTTCCCTACACGACGCTCTTCCGATCTCCAACAtcttgtggaaaggacgaaacaccg |
| R2_index35 | CGGAAT | AATGATACGGCGACCACCGAGATCTACACTCTTTCCCTACACGACGCTCTTCCGATCTCGGAATtcttgtggaaaggacgaaacaccg |
| R2_index36 | CTAGCT | AATGATACGGCGACCACCGAGATCTACACTCTTTCCCTACACGACGCTCTTCCGATCTCTAGCTtcttgtggaaaggacgaaacaccg |
| R2_index37 | CTATAC | AATGATACGGCGACCACCGAGATCTACACTCTTTCCCTACACGACGCTCTTCCGATCTCTATACtcttgtggaaaggacgaaacaccg |
| R2_index38 | CTCAGA | AATGATACGGCGACCACCGAGATCTACACTCTTTCCCTACACGACGCTCTTCCGATCTCTCAGAtcttgtggaaaggacgaaacaccg |
| R2_index39 | TAATCG | AATGATACGGCGACCACCGAGATCTACACTCTTTCCCTACACGACGCTCTTCCGATCTTAATCGtcttgtggaaaggacgaaacaccg |
| R2_index40 | TACAGC | AATGATACGGCGACCACCGAGATCTACACTCTTTCCCTACACGACGCTCTTCCGATCTTACAGCtcttgtggaaaggacgaaacaccg |
| R2_index41 | TATAAT | AATGATACGGCGACCACCGAGATCTACACTCTTTCCCTACACGACGCTCTTCCGATCTTATAATtcttgtggaaaggacgaaacaccg |
| R2_index42 | TCATTC | AATGATACGGCGACCACCGAGATCTACACTCTTTCCCTACACGACGCTCTTCCGATCTTCATTCtcttgtggaaaggacgaaacaccg |
| R2_index43 | TCCCGA | AATGATACGGCGACCACCGAGATCTACACTCTTTCCCTACACGACGCTCTTCCGATCTTCCCGAtcttgtggaaaggacgaaacaccg |
| R2_index44 | TCGAAG | AATGATACGGCGACCACCGAGATCTACACTCTTTCCCTACACGACGCTCTTCCGATCTTCGAAGtcttgtggaaaggacgaaacaccg |
| R2_index45 | TCGGCA | AATGATACGGCGACCACCGAGATCTACACTCTTTCCCTACACGACGCTCTTCCGATCTTCGGCAtcttgtggaaaggacgaaacaccg |

*Note: the R2_reverse and R2_IndexX primers are HPLC-purifed (i.e., Ultramers from IDT Technologies)*
